# Supplementary material for: Methodological quality and reporting standards in systematic reviews with meta-analysis of physical activity studies: a report from the Strengthening the Evidence in Exercise Sciences Initiative (SEES Initiative)
Source: PubMed Central journal article supplement (PMC8638189; doi:10.1186/s13643-021-01845-9), 2021-12-02
Supplement: 13643_2021_1845_MOESM5_ESM.pdf [file 13643_2021_1845_MOESM5_ESM.pdf]

## Additional file 5

**Table. Number of Systematic Reviews with Meta-Analysis (SRMAs) assessed by journal**

| <b>Journal</b>                                                      | <b>SRMAs (n)</b> |
|---------------------------------------------------------------------|------------------|
| American Journal of Sports Medicine                                 | 4                |
| British Journal of Sports Medicine                                  | 34               |
| European Journal of Preventive Cardiology                           | 6                |
| International Journal of Behavioral Nutrition and Physical Activity | 7                |
| Journal of Physiotherapy                                            | 3                |
| Journal of Science and Medicine in Sport                            | 6                |
| Medicine and Science in Sports and Exercise                         | 1                |
| Scandinavian Journal of Medicine & Science in Sports                | 5                |
| Sports Medicine                                                     | 36               |
| The British Medical Journal                                         | 1                |
| <b>Total</b>                                                        | <b>103</b>       |

Journals without SRMAs assessed: Annals of Internal Medicine, Journal of the American Medical Association, Lancet, New England Journal of Medicine
