# Supplementary material for: Methodological quality and reporting standards in systematic reviews with meta-analysis of physical activity studies: a report from the Strengthening the Evidence in Exercise Sciences Initiative (SEES Initiative)
Source: PubMed Central journal article supplement (PMC8638189; doi:10.1186/s13643-021-01845-9), 2021-12-02
Supplement: 13643_2021_1845_MOESM8_ESM.pdf [file 13643_2021_1845_MOESM8_ESM.pdf]

**Table. Frequency distribution of items/recommended practices by domains for the Systematic Reviews with Meta-Analysis (SRMAs) with registration and without registration**

| <b>SRMAs (n=103)</b>        |                                |                                   |          |
|-----------------------------|--------------------------------|-----------------------------------|----------|
|                             | <b>Registration<br/>(n=57)</b> | <b>No registration<br/>(n=46)</b> | <b>p</b> |
| <b>Domain: Transparency</b> |                                |                                   |          |
| <b>Protocol</b>             |                                |                                   | 0.377    |
| No                          | 53 (93.0%)                     | 45 (97.8%)                        |          |
| Yes                         | 4 (7.0%)                       | 1 (2.2%)                          |          |
| <b>Available searches</b>   |                                |                                   | 0.002*   |
| No                          | 5 (8.8%)                       | 15 (32.6%)                        |          |
| Yes                         | 52 (91.2%)                     | 31 (67.4%)                        |          |
| <b>Data Statement</b>       |                                |                                   | 0.145    |
| No                          | 33 (57.9%)                     | 33 (71.7%)                        |          |
| Yes                         | 24 (42.1%)                     | 13 (28.3%)                        |          |
| <b>Domain: Completeness</b> |                                |                                   |          |
| <b>Title as SRMA</b>        |                                |                                   | 0.086    |
| No                          | -                              | 3 (6.5%)                          |          |
| Yes                         | 57 (100%)                      | 43 (93.5%)                        |          |
| <b>Data sources (ab)</b>    |                                |                                   | 0.911    |
| No                          | 18 (31.6%)                     | 15 (32.6%)                        |          |
| Yes                         | 39 (68.4%)                     | 31 (67.4%)                        |          |

|                                        |            |            |        |
|----------------------------------------|------------|------------|--------|
| <b>Key eligibility criteria (ab)</b>   |            |            | 0.045* |
| No                                     | 10 (17.5%) | 16 (34.8%) |        |
| Yes                                    | 47 (82.5%) | 30 (65.2%) |        |
| <b>Number of included studies (ab)</b> |            |            | 0.654  |
| No                                     | 2 (3.5%)   | 3 (6.5%)   |        |
| Yes                                    | 55 (96.5%) | 43 (93.5%) |        |
| <b>Research question</b>               |            |            | 0.644  |
| No                                     | 15 (26.3%) | 14 (30.4%) |        |
| Yes                                    | 42 (73.7%) | 32 (69.6%) |        |
| <b>PICOS explanation</b>               |            |            | 0.014* |
| No                                     | 12 (21.1%) | 20 (43.5%) |        |
| Yes                                    | 45 (78.9%) | 26 (56.5%) |        |
| <b>Number of references</b>            |            |            | 0.403  |
| No                                     | 2 (3.5%)   | 4 (8.7%)   |        |
| Yes                                    | 55 (96.5%) | 42 (91.3%) |        |
| <b>Description of sample sizes</b>     |            |            | 1.000  |
| No                                     | 3 (5.3%)   | 2 (4.3%)   |        |
| Yes                                    | 54 (94.7%) | 44 (95.7%) |        |
| <b>Duration of included studies</b>    |            |            | 0.456  |
| No                                     | 5 (8.8%)   | 2 (4.3%)   |        |
| Yes                                    | 52 (91.2%) | 44 (95.7%) |        |
| <b>Sources of funding</b>              |            |            | 0.043* |
| No                                     | 1 (1.8%)   | 6 (13.0%)  |        |

|                                                    |            |            |        |
|----------------------------------------------------|------------|------------|--------|
| Yes                                                | 56 (98.2%) | 40 (87.0%) |        |
| <b>Potential conflicts of interest</b>             |            |            | 0.043* |
| No                                                 | 1 (1.8%)   | 6 (13.0%)  |        |
| Yes                                                | 56 (98.2%) | 40 (87.0%) |        |
| <b>Domain: Participants</b>                        |            |            |        |
| <b>Description of participants (ab)</b>            |            |            | 0.125  |
| No                                                 | 9 (15.8%)  | 13 (28.3%) |        |
| Yes                                                | 48 (84.2%) | 33 (71.7%) |        |
| <b>Detailed studies' characteristics</b>           |            |            | 0.064  |
| No                                                 | 5 (8.8%)   | 10 (21.7%) |        |
| Yes                                                | 52 (91.2%) | 36 (78.3%) |        |
| <b>Domain: Intervention/exposure</b>               |            |            |        |
| <b>Description of interventions/exposures (ab)</b> |            |            | 0.697  |
| No                                                 | 3 (5.3%)   | 4 (8.7%)   |        |
| Yes                                                | 54 (94.7%) | 42 (91.3%) |        |
| <b>Detailed studies' characteristics</b>           |            |            | 0.064  |
| No                                                 | 5 (8.8%)   | 10 (21.7%) |        |
| Yes                                                | 52 (91.2%) | 36 (78.3%) |        |
| <b>Domain: Outcome</b>                             |            |            |        |
| <b>Main outcome of interest (ab)</b>               |            |            | 0.170  |
| No                                                 | 1 (1.8%)   | 4 (8.7%)   |        |
| Yes                                                | 56 (98.2%) | 42 (91.3%) |        |

|                                                             |            |            |       |
|-------------------------------------------------------------|------------|------------|-------|
| <b><i>Statistical methods</i></b>                           |            |            | 0.984 |
| No                                                          | 10 (17.5%) | 8 (17.4%)  |       |
| Yes                                                         | 47 (82.5%) | 38 (82.6%) |       |
| <b><i>Statistical heterogeneity</i></b>                     |            |            | 0.692 |
| No                                                          | 6 (10.5%)  | 6 (13.0%)  |       |
| Yes                                                         | 51 (89.5%) | 40 (87.0%) |       |
| <b><i>Meta-analytic summary estimates</i></b>               |            |            | 0.073 |
| No                                                          | 13 (22.8%) | 18 (39.1%) |       |
| Yes                                                         | 44 (77.2%) | 28 (60.9%) |       |
| <b><i>Statistics per study</i></b>                          |            |            | 0.327 |
| No                                                          | 23 (40.4%) | 23 (50.0%) |       |
| Yes                                                         | 34 (59.6%) | 23 (50.0%) |       |
| <b>Domain: Methodological rigor</b>                         |            |            |       |
| <b><i>Searches in grey literature</i></b>                   |            |            | 0.102 |
| No                                                          | 23 (40.4%) | 26 (56.5%) |       |
| Yes                                                         | 34 (59.6%) | 20 (43.5%) |       |
| <b><i>Searches from inception or with justification</i></b> |            |            | 0.462 |
| No                                                          | 3 (5.3%)   | 5 (10.9%)  |       |
| Yes                                                         | 54 (94.7%) | 41 (89.1%) |       |
| <b><i>Number of languages</i></b>                           |            |            | 0.222 |
| No (no statement and 1)                                     | 33 (57.9%) | 32 (69.6%) |       |
| Yes (2, 3, 4 and no restriction)                            | 24 (42.1%) | 14 (30.4%) |       |

|                                                  |            |            |        |
|--------------------------------------------------|------------|------------|--------|
| <b><i>Study selection in duplicate</i></b>       |            |            | 0.276  |
| No                                               | 12 (21.1%) | 14 (30.4%) |        |
| Yes and partial yes                              | 45 (78.9%) | 32 (69.6%) |        |
| <b><i>Data extraction in duplicate</i></b>       |            |            | 0.234  |
| No                                               | 29 (50.9%) | 18 (39.1%) |        |
| Yes and partial yes                              | 28 (49.1%) | 28 (60.9%) |        |
| <b><i>Description of RoB assessment</i></b>      |            |            | 0.016* |
| No                                               | -          | 5 (10.9%)  |        |
| Yes                                              | 57 (100%)  | 41 (89.1%) |        |
| <b><i>RoB assessment in duplicate</i></b>        |            |            | 0.159  |
| No                                               | 16 (28.1%) | 19 (41.3%) |        |
| Yes                                              | 41 (71.9%) | 27 (58.7%) |        |
| <b>Domain: Critical appraisal</b>                |            |            |        |
| <b><i>RoB results within studies</i></b>         |            |            | 0.000* |
| No                                               | 1 (1.8%)   | 13 (28.3%) |        |
| Yes                                              | 56 (98.2%) | 33 (71.7%) |        |
| <b><i>Description of protocol deviations</i></b> |            |            | 0.000* |
| No and unclear                                   | 19 (33.3%) | 42 (91.3%) |        |
| Yes and does not apply                           | 38 (66.7%) | 4 (8.7%)   |        |
| <b><i>Presence of spin bias</i></b>              |            |            | 0.075  |
| No                                               | 49 (86.0%) | 33 (71.7%) |        |
| Yes                                              | 8 (14.0%)  | 13 (28.3%) |        |
| <b><i>Discussion addressing RoB</i></b>          |            |            | 0.460  |

|                                                                                       |            |            |       |
|---------------------------------------------------------------------------------------|------------|------------|-------|
| No                                                                                    | 37 (64.9%) | 33 (71.7%) |       |
| Yes                                                                                   | 20 (35.1%) | 13 (28.3%) |       |
| <b><i>Limitations thoroughly addressed</i></b>                                        |            |            | 1.000 |
| No                                                                                    | 3 (5.3%)   | 3 (6.5%)   |       |
| Yes (both for study and review levels,<br>only for study/outcome, only for<br>review) | 54 (94.7%) | 43 (93.5%) |       |

---

ab: abstract; PICOS: acronym for Population, Intervention, Comparator/Control, Outcome, Setting; RoB :  
risk of bias.

\* $p < 0.05$
