# Supplementary material for: Methodological quality and reporting standards in systematic reviews with meta-analysis of physical activity studies: a report from the Strengthening the Evidence in Exercise Sciences Initiative (SEES Initiative)
Source: Springer Nature journal article supplement (doi:10.1186/s13643-021-01845-9), 2021-12-01
Supplement: MOESM9 [file 19924512]

**Table. Frequency distribution of items/recommended practices by domains for the Systematic Reviews with Meta-Analysis (SRMAs) with open access and without open access**

| <b>SRMAs (n=103)</b>        |                               |                                  |          |
|-----------------------------|-------------------------------|----------------------------------|----------|
|                             | <b>Open access<br/>(n=27)</b> | <b>No Open access<br/>(n=76)</b> | <b>p</b> |
| <b>Domain: Transparency</b> |                               |                                  |          |
| <b>Registration</b>         |                               |                                  | 0.633    |
| No                          | 11 (40.7%)                    | 35 (46.1%)                       |          |
| Yes                         | 16 (59.3%)                    | 41 (53.9%)                       |          |
| <b>Protocol</b>             |                               |                                  | 1.000    |
| No                          | 26 (96.3%)                    | 72 (94.7%)                       |          |
| Yes                         | 1 (3.7%)                      | 4 (5.3%)                         |          |
| <b>Available searches</b>   |                               |                                  | 0.482    |
| No                          | 4 (14.8%)                     | 16 (21.1%)                       |          |
| Yes                         | 23 (85.2%)                    | 60 (78.9%)                       |          |
| <b>Data Statement</b>       |                               |                                  | 0.123    |
| No                          | 14 (51.9%)                    | 52 (68.4%)                       |          |
| Yes                         | 13 (48.1%)                    | 24 (31.6%)                       |          |
| <b>Domain: Completeness</b> |                               |                                  |          |
| <b>Title as SRMA</b>        |                               |                                  | 0.565    |
| No                          | -                             | 3 (3.9%)                         |          |
| Yes                         | 27 (100%)                     | 73 (96.1%)                       |          |

|                                        |            |            |        |
|----------------------------------------|------------|------------|--------|
| <b>Data sources (ab)</b>               |            |            | 0.517  |
| No                                     | 10 (37.0%) | 23 (30.3%) |        |
| Yes                                    | 17 (63.0%) | 53 (69.7%) |        |
| <b>Key eligibility criteria (ab)</b>   |            |            | 0.049* |
| No                                     | 3 (11.1%)  | 23 (30.3%) |        |
| Yes                                    | 24 (88.9%) | 53 (69.7%) |        |
| <b>Number of included studies (ab)</b> |            |            | 0.322  |
| No                                     | -          | 5 (6.6%)   |        |
| Yes                                    | 27 (100%)  | 71 (93.4%) |        |
| <b>Research question</b>               |            |            | 0.425  |
| No                                     | 6 (22.2%)  | 23 (30.3%) |        |
| Yes                                    | 21 (77.8%) | 53 (69.7%) |        |
| <b>PICOS explanation</b>               |            |            | 0.851  |
| No                                     | 8 (29.6%)  | 24 (31.6%) |        |
| Yes                                    | 19 (70.4%) | 52 (68.4%) |        |
| <b>Number of references</b>            |            |            | 0.183  |
| No                                     | 3 (11.1%)  | 3 (3.9%)   |        |
| Yes                                    | 24 (88.9%) | 73 (96.1%) |        |
| <b>Description of sample sizes</b>     |            |            | 0.322  |
| No                                     | -          | 5 (6.6%)   |        |
| Yes                                    | 27 (100%)  | 71 (93.4%) |        |
| <b>Duration of included studies</b>    |            |            | 1.000  |
| No                                     | 2 (7.4%)   | 5 (6.6%)   |        |

|                                        |            |            |       |
|----------------------------------------|------------|------------|-------|
| Yes                                    | 25 (92.6%) | 71 (93.4%) |       |
| <b>Sources of funding</b>              |            |            | 0.185 |
| No                                     | -          | 7 (9.2%)   |       |
| Yes                                    | 27 (100%)  | 69 (90.8%) |       |
| <b>Potential conflicts of interest</b> |            |            | 0.185 |
| No                                     | -          | 7 (9.2%)   |       |
| Yes                                    | 27 (100%)  | 69 (90.8%) |       |

**Domain: Participants**

|                                          |            |            |       |
|------------------------------------------|------------|------------|-------|
| <b>Description of participants (ab)</b>  |            |            | 0.899 |
| No                                       | 6 (22.2%)  | 16 (21.1%) |       |
| Yes                                      | 21 (77.8%) | 60 (78.9%) |       |
| <b>Detailed studies' characteristics</b> |            |            | 0.754 |
| No                                       | 3 (11.1%)  | 12 (15.8%) |       |
| Yes                                      | 24 (88.9%) | 64 (84.2%) |       |

**Domain: Intervention/exposure**

|                                                    |            |            |       |
|----------------------------------------------------|------------|------------|-------|
| <b>Description of interventions/exposures (ab)</b> |            |            | 0.673 |
| No                                                 | 1 (3.7%)   | 6 (7.9%)   |       |
| Yes                                                | 26 (96.3%) | 70 (92.1%) |       |
| <b>Detailed studies' characteristics</b>           |            |            | 0.754 |
| No                                                 | 3 (11.1%)  | 12 (15.8%) |       |
| Yes                                                | 24 (88.9%) | 64 (84.2%) |       |

**Domain: Outcome**

|                                                      |            |            |        |
|------------------------------------------------------|------------|------------|--------|
| <b>Main outcome of interest (ab)</b>                 |            |            | 1.000  |
| No                                                   | 1 (3.7%)   | 4 (5.3%)   |        |
| Yes                                                  | 26 (96.3%) | 72 (94.7%) |        |
| <b>Statistical methods</b>                           |            |            | 0.775  |
| No                                                   | 4 (14.8%)  | 14 (18.4%) |        |
| Yes                                                  | 23 (85.2%) | 62 (81.6%) |        |
| <b>Statistical heterogeneity</b>                     |            |            | 0.292  |
| No                                                   | 5 (18.5%)  | 7 (9.2%)   |        |
| Yes                                                  | 22 (81.5%) | 69 (90.8%) |        |
| <b>Meta-analytic summary estimates</b>               |            |            | 0.670  |
| No                                                   | 9 (33.3%)  | 22 (28.9%) |        |
| Yes                                                  | 18 (66.7%) | 54 (71.1%) |        |
| <b>Statistics per study</b>                          |            |            | 0.633  |
| No                                                   | 11 (40.7%) | 35 (46.1%) |        |
| Yes                                                  | 16 (59.3%) | 41 (53.9%) |        |
| <b>Domain: Methodological rigor</b>                  |            |            |        |
| <b>Searches in grey literature</b>                   |            |            | 0.030* |
| No                                                   | 8 (29.6%)  | 41 (53.9%) |        |
| Yes                                                  | 19 (70.4%) | 35 (46.1%) |        |
| <b>Searches from inception or with justification</b> |            |            | 0.429  |
| No                                                   | 3 (11.1%)  | 5 (6.6%)   |        |
| Yes                                                  | 24 (88.9%) | 71 (93.4%) |        |

|                                                  |            |            |       |
|--------------------------------------------------|------------|------------|-------|
| <b><i>Number of languages</i></b>                |            |            | 0.169 |
| No (no statement and 1)                          | 20 (74.1%) | 45 (59.2%) |       |
| Yes (2, 3, 4 and no restriction)                 | 7 (25.9%)  | 31 (40.8%) |       |
| <b><i>Study selection in duplicate</i></b>       |            |            | 0.541 |
| No                                               | 8 (29.6%)  | 18 (23.7%) |       |
| Yes and partial yes                              | 19 (70.4%) | 58 (76.3%) |       |
| <b><i>Data extraction in duplicate</i></b>       |            |            | 0.297 |
| No                                               | 10 (37.0%) | 37 (48.7%) |       |
| Yes and partial yes                              | 17 (63.0%) | 39 (51.3%) |       |
| <b><i>Description of RoB assessment</i></b>      |            |            | 0.322 |
| No                                               | -          | 5 (6.6%)   |       |
| Yes                                              | 27 (100%)  | 41 (93.4%) |       |
| <b><i>RoB assessment in duplicate</i></b>        |            |            | 0.696 |
| No                                               | 10 (37.0%) | 25 (32.9%) |       |
| Yes                                              | 17 (63.0%) | 51 (67.1%) |       |
| <b>Domain: Critical appraisal</b>                |            |            |       |
| <b><i>RoB results within studies</i></b>         |            |            | 1.000 |
| No                                               | 3 (11.1%)  | 11 (14.5%) |       |
| Yes                                              | 24 (88.9%) | 65 (85.5%) |       |
| <b><i>Description of protocol deviations</i></b> |            |            | 0.170 |
| No and unclear                                   | 19 (70.4%) | 42 (55.3%) |       |
| Yes and does not apply                           | 8 (29.6%)  | 34 (44.7%) |       |
| <b><i>Presence of spin bias</i></b>              |            |            | 0.165 |

|                                                                                       |            |            |       |
|---------------------------------------------------------------------------------------|------------|------------|-------|
| No                                                                                    | 19 (70.4%) | 63 (82.9%) |       |
| Yes                                                                                   | 8 (29.6%)  | 13 (17.1%) |       |
| <b><i>Discussion addressing RoB</i></b>                                               |            |            | 0.755 |
| No                                                                                    | 19 (70.4%) | 51 (67.1%) |       |
| Yes                                                                                   | 8 (29.6%)  | 25 (32.9%) |       |
| <b><i>Limitations thoroughly addressed</i></b>                                        |            |            | 0.651 |
| No                                                                                    | 2 (7.4%)   | 4 (5.3%)   |       |
| Yes (both for study and review levels,<br>only for study/outcome, only for<br>review) | 25 (92.6%) | 72 (94.7%) |       |

---

ab: abstract; PICOS: acronym for Population, Intervention, Comparator/Control, Outcome, Setting; RoB : risk of bias.

\* $p < 0.05$
